# Supplementary material
Source: publisher site journal article supplement (https://www.dovepress.com/article/324543)
Supplement: Supplementary file 1 [file get_supplementary_file.php]

**Table S1. Five-year conditional overall survival and failure-free survival probabilities of all patients for different risk groups over time (N=384).**

|                                             | Time since treatment |        |        |         |         |
|---------------------------------------------|----------------------|--------|--------|---------|---------|
|                                             | 1 year               | 2 year | 3 year | 4 year  | 5 year  |
| <b>All patients</b>                         |                      |        |        |         |         |
| 5-year COS (%)                              | 87                   | 88     | 92     | 92      | 94      |
| 95%CI (%)                                   | 81-92                | 82-93  | 86-96  | 81-97   | 81-98   |
| 5-year CFFS (%)                             | 85                   | 90     | 94     | 93      | 96      |
| 95%CI (%)                                   | 79-90                | 84-94  | 88-97  | 79-98   | 75-99   |
| <b>Early-stage patients</b>                 |                      |        |        |         |         |
| 5-year COS (%)                              | 94                   | 94     | 97     | 95      | 95      |
| 95%CI (%)                                   | 88-97                | 88-97  | 91-99  | 68-99   | 68-99   |
| 5-year CFFS (%)                             | 93                   | 96     | 97     | 92      | 94      |
| 95%CI (%)                                   | 86-96                | 88-98  | 89-99  | 67-98   | 63-99   |
| <b>Early-stage with favorable factors</b>   |                      |        |        |         |         |
| 5-year COS (%)                              | 97                   | 98     | 98     | 100     | 100     |
| 95%CI (%)                                   | 86-99                | 86-100 | 86-100 | 100-100 | 100-100 |
| 5-year CFFS (%)                             | 96                   | 96     | 97     | 100     | 100     |
| 95%CI (%)                                   | 83-99                | 83-99  | 83-100 | 100-100 | 100-100 |
| <b>Early-stage with unfavorable factors</b> |                      |        |        |         |         |
| 5-year COS (%)                              | 92                   | 92     | 96     | 93      | 93      |
| 95%CI (%)                                   | 82-96                | 82-96  | 86-99  | 59-99   | 59-99   |
| 5-year CFFS (%)                             | 90                   | 96     | 97     | 88      | 91      |
| 95%CI (%)                                   | 79-95                | 83-99  | 81-100 | 55-97   | 51-99   |

| <b>Advanced-stage patients</b>   |       |        |         |         |         |
|----------------------------------|-------|--------|---------|---------|---------|
| 5-year COS (%)                   | 81    | 83     | 88      | 92      | 95      |
| 95%CI (%)                        | 70-89 | 71-90  | 75-94   | 79-97   | 80-99   |
| 5-year CFFS (%)                  | 76    | 84     | 91      | 96      | 100     |
| 95%CI (%)                        | 65-84 | 72-91  | 79-96   | 83-99   | 100-100 |
| <b>Low IPS score (&lt;3)</b>     |       |        |         |         |         |
| 5-year COS (%)                   | 95    | 96     | 96      | 96      | 96      |
| 95%CI (%)                        | 77-99 | 74-100 | 74-100  | 74-100  | 74-100  |
| 5-year CFFS (%)                  | 89    | 95     | 100     | 100     | 100     |
| 95%CI (%)                        | 77-95 | 83-99  | 100-100 | 100-100 | 100-100 |
| <b>High IPS score (≥3)</b>       |       |        |         |         |         |
| 5-year COS (%)                   | 64    | 64     | 72      | 78      | 87      |
| 95%CI (%)                        | 44-78 | 44-79  | 50-85   | 54-91   | 57-97   |
| 5-year CFFS (%)                  | 61    | 69     | 75      | 81      | 100     |
| 95%CI (%)                        | 42-75 | 48-83  | 52-88   | 57-93   | 100-100 |
| <b>Patients with CR</b>          |       |        |         |         |         |
| 5-year COS (%)                   | 93    | 80     | 89      | 91      | 92      |
| 95%CI (%)                        | 86-97 | 62-90  | 68-96   | 71-97   | 71-98   |
| <b>Patients with PR</b>          |       |        |         |         |         |
| 5-year COS (%)                   | 78    | 93     | 95      | 91      | 92      |
| 95%CI (%)                        | 60-88 | 86-97  | 88-98   | 73-97   | 72-98   |
| <b>Patients with no response</b> |       |        |         |         |         |
| 5-year COS (%)                   | 66    | 70     | 74      | 88      | 100     |
| 95%CI (%)                        | 36-84 | 37-88  | 38-91   | 39-98   | 100-100 |

Figure S1. The structure of patients in year-fashion accrual (N=384).

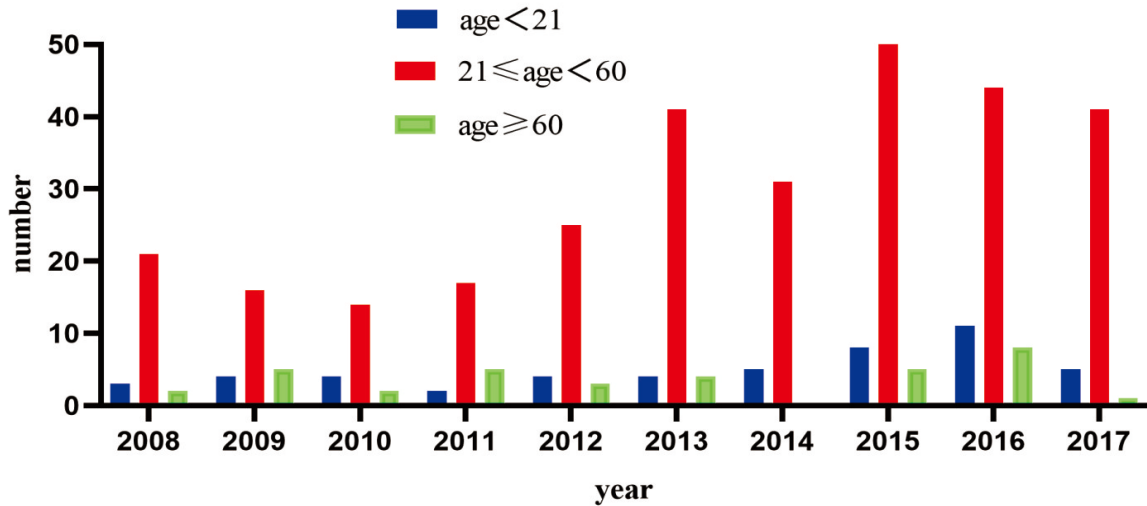

|        |    |    |    |    |    |    |    |    |    |    |
|--------|----|----|----|----|----|----|----|----|----|----|
| Male   | 13 | 18 | 10 | 8  | 15 | 33 | 23 | 33 | 40 | 6  |
| Female | 13 | 7  | 10 | 16 | 17 | 16 | 13 | 29 | 23 | 23 |

Figure S2. Conditional overall survival and death hazard estimates stratified by treatment response (N=384).

A 5-year COS

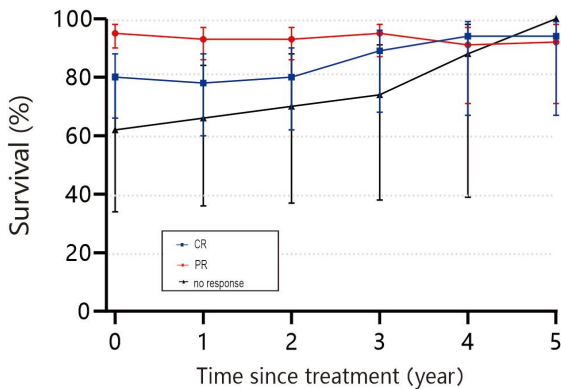

No. at risk

|             |     |     |     |     |     |    |
|-------------|-----|-----|-----|-----|-----|----|
| CR          | 274 | 251 | 194 | 140 | 110 | 23 |
| PR          | 71  | 64  | 60  | 41  | 27  | 20 |
| no response | 39  | 37  | 24  | 16  | 10  | 5  |

B Death hazard

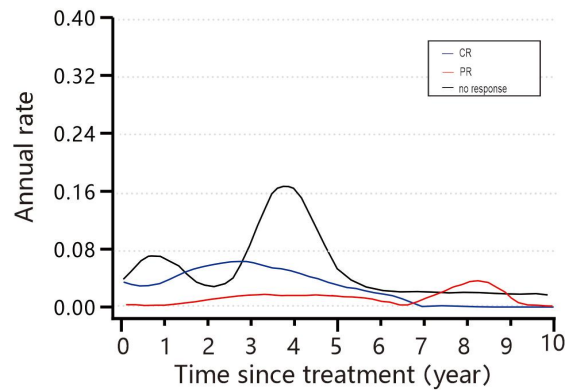

No. at risk

|             |     |     |     |    |    |   |
|-------------|-----|-----|-----|----|----|---|
| CR          | 274 | 194 | 110 | 73 | 31 | 5 |
| PR          | 71  | 60  | 27  | 17 | 9  | 3 |
| no response | 39  | 24  | 16  | 4  | 4  | 1 |

A: 5-year COS is the 5-year conditional overall survival over time of patients who achieved complete remission (CR), partial remission (PR), or failed to respond (no response). B: Smoothed plots of the hazard estimates of death over time in patients with CR, PR, and no response.

**Figure S3. Conditional survival of patients stratified by stages and risk groups under different treatment regimens.**

**A** 5-year COS of early-stage unfavorable

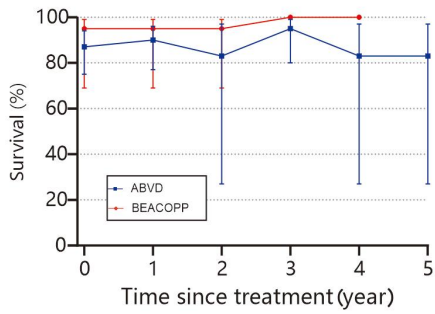

No. at risk

|         |     |    |    |    |    |    |
|---------|-----|----|----|----|----|----|
| ABVD    | 101 | 89 | 72 | 50 | 29 | 18 |
| BEACOPP | 22  | 22 | 21 | 19 | 17 | 16 |

**B** 5-year CFFS of early stage unfavorable

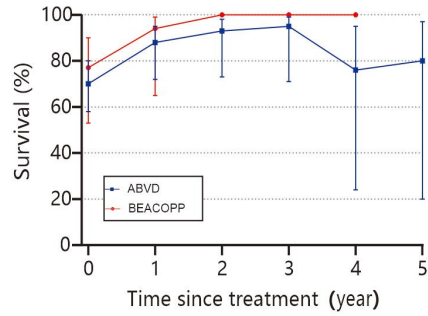

No. at risk

|         |     |    |    |    |    |    |
|---------|-----|----|----|----|----|----|
| ABVD    | 101 | 74 | 56 | 39 | 25 | 16 |
| BEACOPP | 22  | 18 | 16 | 15 | 14 | 13 |

**C** 5-year COS of advanced-stage

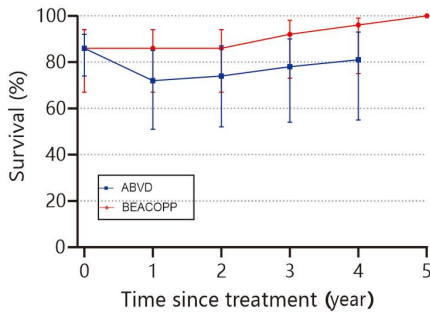

No. at risk

|         |     |     |    |    |    |    |
|---------|-----|-----|----|----|----|----|
| ABVD    | 134 | 125 | 89 | 53 | 41 | 20 |
| BEACOPP | 32  | 29  | 29 | 25 | 27 | 25 |

**D** 5-year CFFS of advanced-stage

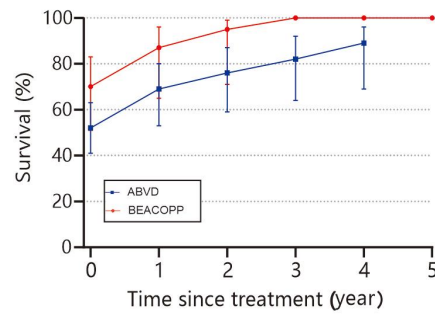

No. at risk

|         |     |    |    |    |    |    |
|---------|-----|----|----|----|----|----|
| ABVD    | 134 | 97 | 34 | 67 | 41 | 31 |
| BEACOPP | 32  | 23 | 21 | 20 | 20 | 19 |

**E** 5-year COS of advanced-stage with BEACOPP

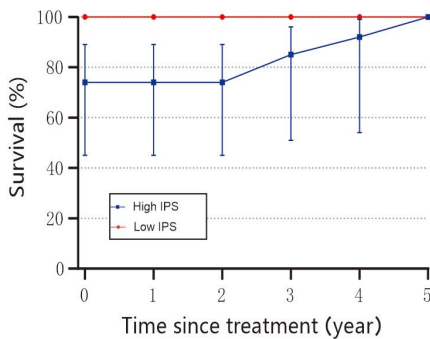

No. at risk

|          |    |    |    |    |    |    |
|----------|----|----|----|----|----|----|
| Low IPS  | 16 | 13 | 13 | 13 | 13 | 13 |
| High IPS | 16 | 16 | 16 | 14 | 12 | 10 |

**F** 5-year CFFS of advanced-stage with BEACOPP

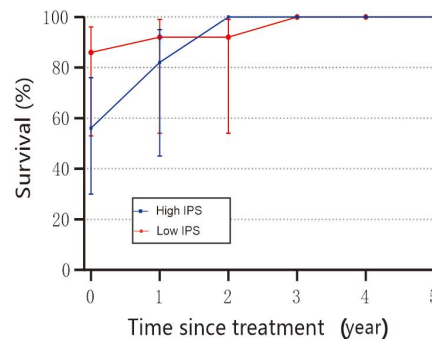

No. at risk

|          |    |    |    |    |    |    |
|----------|----|----|----|----|----|----|
| Low IPS  | 16 | 12 | 12 | 11 | 11 | 11 |
| High IPS | 16 | 11 | 9  | 9  | 9  | 8  |

A: 5-year COS is the 5-year conditional overall survival over time of early-stage patients with unfavorable factors treated with ABVD or BEACOPP regimens. B: 5-year CFFS is the 5-year

conditional failure-free survival over time of early-stage patients with unfavorable factors treated with ABVD or BEACOPP regimens (Error bars denote 95% CIs). C: 5-year COS is the 5-year conditional overall survival over time of advanced-stage patients treated with ABVD or BEACOPP regimens, D: 5-year CFFS is the 5-year conditional failure-free survival over time of advanced-stage patients treated with ABVD or BEACOPP regimens (Error bars denote 95% CIs). E: 5-year COS is the 5-year conditional overall survival over time of advanced-stage patients who received the BEACOPP regimen according to IPS score. F: 5-year CFFS is the 5-year conditional failure-free survival over time of advanced-stage patients who received the BEACOPP regimen according to IPS score.
